# Supplementary material for: Ex Vivo Fluorescence Confocal Microscopy (FCM) Ensures Representative Tissue in Prostate Cancer Biobanking: A Feasibility Study
Source: MDPI journal article supplement (doi:10.3390/ijms232012103), 2022-10-11
Supplement: s1 [file s1]

# Supplementary Materials

## Ex Vivo Fluorescence Confocal Microscopy (FCM) Ensures Representative Tissue in Prostate Cancer Biobanking: A Feasibility Study

Ulf Titze <sup>1,\*</sup>, Johannes Sommerkamp <sup>1</sup>, Clara Stege <sup>1</sup>, Fried Schneider <sup>2</sup>, Christoph Brochhausen <sup>3,4</sup>,  
Birte Schulz <sup>1</sup>, Barbara Titze <sup>1</sup>, Furat Abd Ali <sup>2</sup>, Sasa Pokupic <sup>2</sup>, Karl-Dietrich Sievert <sup>2,†</sup>  
and Torsten Hansen <sup>1,†</sup>

<sup>1</sup> Institute of Pathology, University Hospital OWL of the University of Bielefeld, Campus Lippe, 32756 Detmold, Germany

<sup>2</sup> Department of Urology, University Hospital OWL of the University of Bielefeld, Campus Lippe, 32756 Detmold, Germany

<sup>3</sup> Institute of Pathology, University of Regensburg, 93053 Regensburg, Germany

<sup>4</sup> Central Biobank Regensburg, University Hospital Regensburg, 93053 Regensburg, Germany

\* Correspondence: ulf.titze@klinikum-lippe.de (U.T.); Tel.: +49-05231-72-3451

† K.-D.S. and T.H. equally contributed to this work.

### Content:

Figure S1: Study design

Figure S2: Analysis of biobank samples

Table S1: Processing Times of FCM-Analyses

Table S2: DNA extraction from representative biobank samples of tumorous and normal tissue

## Study design

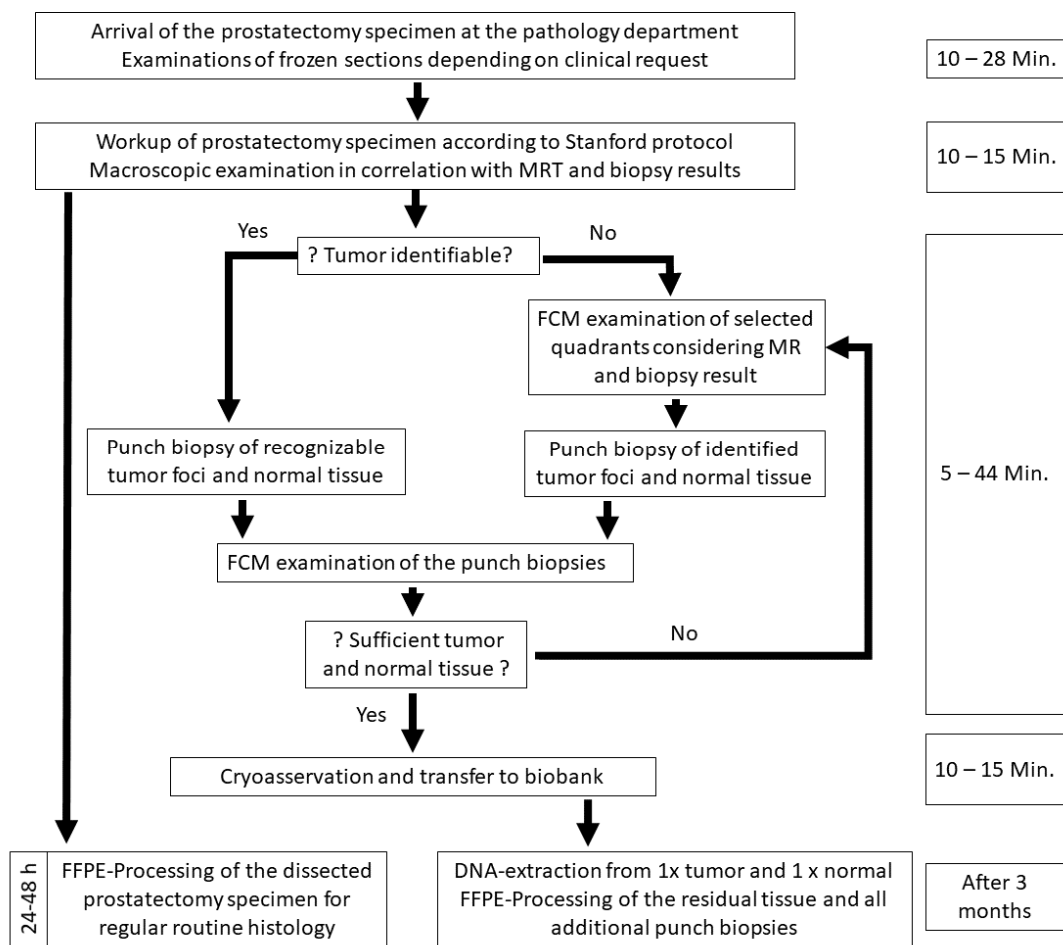

Figure S1: Workflow of surgical dissection, macroscopic examinations and FCM analyses of prostatectomy specimens and biobank samples.

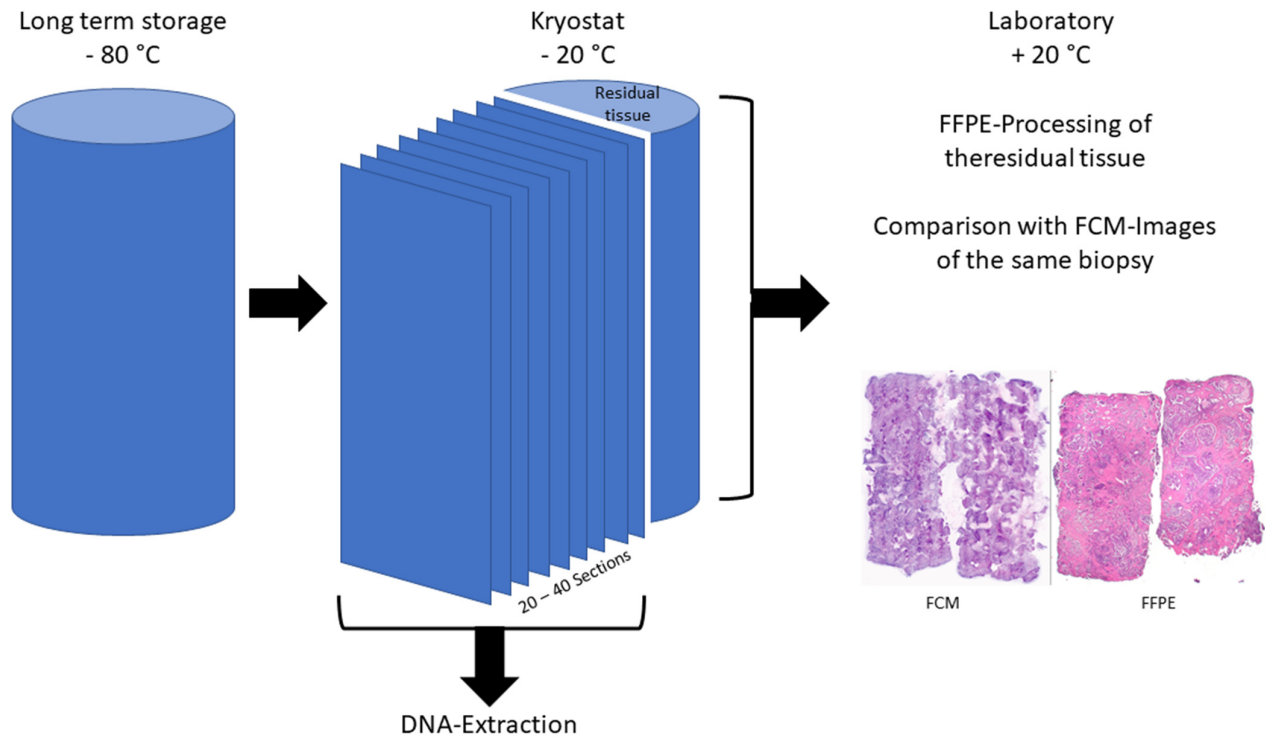

Figure S2: Analysis of biobank samples

The selected biopsy core is taken from the biobank (-80 °C) and brought to cutting temperature (-20 °C) in the cryostat. Depending on the size, 20-40 cryostat sections are prepared from the biopsy for DNA extraction. The residual tissue remaining on the stamp is further processed according to FFPE procedure. The HE-stained sections are compared with the FCM scans of the same biopsy.

Table S1: Total Processing times of FCM-Analyses and resulting ischemia time of the biobank samples

| Pat | Number of FCM-Scans* |                 |       | Duration of FCM-Examinations [min] | Ischemia [min] |
|-----|----------------------|-----------------|-------|------------------------------------|----------------|
|     | Small Biopsies       | Whole Quadrants | Total |                                    |                |
| P01 | 3                    | 1               | 4     | 16                                 | n.a.           |
| P02 | 2                    | 0               | 2     | 24                                 | 38             |
| P03 | 2                    | 0               | 2     | 6                                  | 40             |
| P04 | 3                    | 0               | 3     | 9                                  | n.a.           |
| P05 | 3                    | 0               | 3     | 10                                 | 27             |
| P06 | 2                    | 0               | 2     | 6                                  | n.a.           |
| P07 | 2                    | 0               | 2     | 8                                  | 40             |
| P08 | 2                    | 0               | 2     | 5                                  | 20             |
| P09 | 2                    | 0               | 2     | 8                                  | 23             |
| P10 | 3                    | 0               | 3     | 9                                  | 49             |
| P11 | 3                    | 0               | 3     | 33                                 | 41             |
| P12 | 5                    | 0               | 5     | 17                                 | 39             |
| P13 | 1                    | 0               | 1     | 5                                  | 90             |
| P14 | 3                    | 0               | 3     | 18                                 | 56             |
| P15 | 2                    | 0               | 2     | 9                                  | 41             |
| P16 | 2                    | 0               | 2     | 6                                  | 55             |
| P17 | 3                    | 0               | 3     | 13                                 | 51             |
| P18 | 2                    | 2               | 4     | 24                                 | 43             |
| P19 | 2                    | 2               | 4     | 16                                 | 49             |
| P20 | 4                    | 1               | 5     | 37                                 | 76             |
| P21 | 1                    | 0               | 1     | 5                                  | 36             |
| P22 | 5                    | 1               | 6     | 31                                 | 83             |
| P23 | 2                    | 1               | 3     | 35                                 | 73             |
| P24 | 6                    | 0               | 6     | 27                                 | 78             |
| P25 | 2                    | 0               | 2     | 11                                 | 56             |
| P26 | 3                    | 0               | 3     | 16                                 | 39             |
| P27 | 2                    | 1               | 3     | 18                                 | 49             |
| P28 | 3                    | 0               | 3     | 12                                 | 32             |
| P29 | 1                    | 0               | 1     | 5                                  | 59             |
| P30 | 5                    | 1               | 6     | 44                                 | 52             |
| P31 | 2                    | 0               | 2     | 6                                  | 26             |
| P32 | 2                    | 0               | 2     | 6                                  | 24             |
| P33 | 4                    | 0               | 4     | 14                                 | 34             |
| P34 | 2                    | 0               | 2     | 5                                  | 75             |
| P35 | 4                    | 0               | 4     | 30                                 | 109            |
| P36 | 3                    | 0               | 3     | 15                                 | 79             |
| P37 | 2                    | 0               | 2     | 7                                  | 22             |
| P38 | 3                    | 0               | 3     | 8                                  | 23             |
| P39 | 3                    | 0               | 3     | 20                                 | 48             |
| P40 | 5                    | 0               | 5     | 28                                 | 56             |
| Ø   |                      |                 | 3.0   | 15.6                               | 49.5           |
| ±   |                      |                 | 1.3   | 10.5                               | 21.3           |
| Max |                      |                 | 6     | 44                                 | 109            |
| Min |                      |                 | 1     | 5                                  | 20             |

Processing times were reconstructed based on the documented times of specimen receipt and frozen section reporting, as well as the metadata of the FCM images. For the punch biopsy\* scans, in some cases (especially P13, P21, P29) multiple samples from different collecting sites were examined in one single scan, resulting in a significant reduction of processing time.

Table S2: DNA extraction from representative biobank samples of tumorous and normal tissue.

| Pat. | Tumor tissue |         |      |                   |                      |                      | Normal tissue |                   |                      |                      |
|------|--------------|---------|------|-------------------|----------------------|----------------------|---------------|-------------------|----------------------|----------------------|
|      | Block        | PCa [%] | ISUP | DNA [ng/ $\mu$ l] | A <sub>260/280</sub> | A <sub>260/230</sub> | Block         | DNA [ng/ $\mu$ l] | A <sub>260/280</sub> | A <sub>260/230</sub> |
| P01  | RE1          | 30      | 4    | 72.1              | 1.86                 | 2.51                 | LD2           | 12.6              | 1.79                 | 2.46                 |
| P02  | LB1          | 100     | 3    | 66.3              | 1.99                 | 2.20                 | RF2           | 45.8              | 1.91                 | 2.20                 |
| P04  | RD2          | 20      | 1    | 140               | 1.91                 | 2.16                 | LD2           | 580               | 1.92                 | 2.27                 |
| P05  | LC2          | 70      | 2    | 498               | 1.94                 | 2.23                 | RC2           | 230               | 1.94                 | 2.35                 |
| P06  | RC2          | 80      | 3    | 241               | 1.91                 | 2.17                 | LB2           | 163               | 1.93                 | 2.31                 |
| P07  | RD2          | 80      | 2    | 431               | 1.93                 | 2.17                 | LE2           | 51.2              | 1.83                 | 2.10                 |
| P08  | LD2          | 100     | 3    | 370               | 1.96                 | 2.28                 | RD2           | 570               | 1.96                 | 2.23                 |
| P09  | RD2          | 100     | 1    | 257               | 1.90                 | 2.26                 | LC1           | 35.8              | 1.84                 | 1.93                 |
| P10  | RD1          | 90      | 1    | 125               | 1.92                 | 2.04                 | RD2           | 450               | 1.91                 | 2.28                 |
| P11  | LB2          | 100     | 2    | 228               | 1.87                 | 1.84                 | RD2           | 243               | 1.88                 | 2.10                 |
| P12  | LC2          | 100     | 2    | 257               | 1.96                 | 2.35                 | LII2          | 108               | 1.97                 | 2.20                 |
| P13  | LC2          | 90      | 2    | 25.6              | 1.97                 | 2.27                 | RE2           | 106               | 1.89                 | 2.22                 |
| P14  | RC2          | 100     | 3    | 560               | 1.94                 | 2.34                 | LC1           | 298               | 1.90                 | 2.34                 |
| P15  | RB2          | 100     | 3    | 459               | 1.95                 | 2.28                 | LE2           | 225               | 1.85                 | 2.22                 |
| P16  | LE2          | 50      | 2    | 70.7              | 1.99                 | 2.07                 | RC2           | 393               | 1.92                 | 2.24                 |
| P17  | RD2          | 100     | 1    | 310               | 1.92                 | 2.25                 | LE2           | 177               | 1.97                 | 2.06                 |
| P19  | LE2          | 100     | 3    | 76                | 1.96                 | 2.20                 | RD1           | 297               | 1.93                 | 2.30                 |
| P21  | RD2          | 70      | 1    | 203               | 1.89                 | 2.27                 | LD1           | 99.9              | 1.91                 | 2.37                 |
| P22  | RC2          | 10      | 1    | 258               | 1.95                 | 2.24                 | RE2           | 228               | 1.86                 | 2.15                 |
| P24  | LE1          | 75      | 1    | 368               | 1.93                 | 2.33                 | LE2           | 306               | 1.94                 | 2.25                 |
| P25  | LB1          | 70      | 1    | 339               | 1.92                 | 2.34                 | RB2           | 570               | 1.92                 | 2.20                 |
| P26  | LD1          | 40      | 1    | 119               | 1.86                 | 2.10                 | LB1           | 303               | 1.90                 | 2.31                 |
| P27  | LC2          | 70      | 5    | 530               | 1.90                 | 2.21                 | RD2           | 570               | 1.87                 | 2.16                 |
| P28  | RB2          | 40      | 2    | 257               | 1.93                 | 2.33                 | RF1           | 114               | 1.92                 | 2.20                 |
| P29  | LB2          | 100     | 2    | 520               | 1.92                 | 2.32                 | RB1           | 299               | 1.95                 | 2.12                 |
| P30  | RB2          | 20      | 2    | 386               | 1.95                 | 2.27                 | LD1           | 492               | 1.90                 | 2.20                 |
| P31  | RB2          | 70      | 2    | 362               | 1.97                 | 2.19                 | LE1           | 510               | 1.94                 | 2.31                 |
| P32  | RE2          | 100     | 3    | 590               | 1.95                 | 2.31                 | LE2           | 264               | 1.96                 | 2.23                 |
| P33  | LII1         | 90      | 2    | 405               | 1.95                 | 2.23                 | RD2           | 425               | 1.93                 | 2.23                 |
| P34  | LC1          | 80      | 2    | 239               | 1.95                 | 2.26                 | RC2           | 365               | 1.95                 | 2.11                 |
| P35  | LD2          | 80      | 3    | 342               | 1.94                 | 2.20                 | RC2           | 116               | 1.92                 | 2.25                 |
| P36  | RC2          | 100     | 2    | 449               | 1.95                 | 2.25                 | LE1           | 461               | 1.93                 | 2.31                 |
| P37  | RC2          | 90      | 1    | 384               | 1.96                 | 2.22                 | LB2           | 208               | 1.91                 | 2.38                 |
| P38  | RC2          | 100     | 4    | 530               | 1.90                 | 2.21                 | LC1           | 211               | 1.97                 | 2.28                 |
| P39  | RC1          | 100     | 1    | 189               | 1.98                 | 2.31                 | LB1           | 227               | 1.97                 | 2.24                 |
| P40  | RB1          | 50      | 4    | 142               | 1.96                 | 2.19                 | RD1           | 570               | 1.93                 | 2.03                 |
| Ø    |              | 76.67   |      | 300.0             | 1.93                 | 2.23                 |               | 286.8             | 1.91                 | 2.22                 |
| ±    |              | 27.49   |      | 159.6             | 0.03                 | 0.11                 |               | 174.0             | 0.04                 | 0.11                 |
| Max  |              | 100     |      | 590.0             | 1.99                 | 2.51                 |               | 580.0             | 1.97                 | 2.46                 |
| Min  |              | 10      |      | 25.6              | 1.86                 | 1.84                 |               | 12.6              | 1.79                 | 1.93                 |

Representative samples of tumor and normal tissue were obtained in 36/40 (90%) patients. Sufficient amounts of DNA with appropriate purity for further molecular analyses could be extracted from the samples.
